# Supplementary material for: Biorationals and Synthetic Insecticides for Controlling Fall Armyworm and Their Influence on the Abundance and Diversity of Parasitoids
Source: MDPI journal article supplement (doi:10.3390/su16083118), 2024-04-09
Supplement: s1 [file s1]

**Supplementary Table S1.** Total number of egg masses collected, total number of *Telenomus remus* recovered, and parasitism of *Spodoptera frugiperda* egg masses under different treatments in 2020.

| Treatment                     | No. of Egg masses collected |       | No. of parasitoids |       | No. of Egg masses parasitized |       | Overall parasitism (%) |       |
|-------------------------------|-----------------------------|-------|--------------------|-------|-------------------------------|-------|------------------------|-------|
|                               | 2020A                       | 2020B | 2020A              | 2020B | 2020A                         | 2020B | 2020A                  | 2020B |
| <b>Lira</b>                   |                             |       |                    |       |                               |       |                        |       |
| Amdocs®                       | 12                          | 3     | 113                | 20    | 6                             | 2     | 50.0                   | 66.7  |
| Rocket®                       | 11                          | 2     | 65                 | 0     | 1                             | 0     | 9.1                    | 0.0   |
| <i>Beauveria bassiana</i>     | 19                          | 2     | 0                  | 12    | 0                             | 1     | 0.0                    | 50.0  |
| <i>Metarhizium anisopliae</i> | 11                          | 6     | 16                 | 23    | 1                             | 1     | 9.1                    | 16.7  |
| Nimbecidine®                  | 11                          | 6     | 0                  | 30    | 0                             | 1     | 0.0                    | 16.7  |
| Control                       | 2                           | 7     | 14                 | 0     | 2                             | 0     | 100.0                  | 0.0   |
| <b>Wakiso</b>                 |                             |       |                    |       |                               |       |                        |       |
| Amdocs®                       | 19                          | 14    | 77                 | 0     | 3                             | 0     | 15.8                   | 0.0   |
| Rocket®                       | 16                          | 7     | 32                 | 0     | 3                             | 0     | 18.8                   | 0.0   |
| <i>Beauveria bassiana</i>     | 14                          | 6     | 140                | 0     | 5                             | 0     | 35.7                   | 0.0   |
| <i>Metarhizium anisopliae</i> | 15                          | 8     | 22                 | 25    | 2                             | 2     | 13.3                   | 25.0  |
| Nimbecidine®                  | 17                          | 7     | 103                | 0     | 5                             | 0     | 29.4                   | 0.0   |
| Control                       | 11                          | 3     | 63                 | 0     | 2                             | 0     | 18.2                   | 0.0   |

The letters A and B after a year denote first and second rainy season, respectively.

**Supplementary Table S2.** Total number of egg masses collected, total number of *Telenomus remus* recovered, and parasitism of *Spodoptera frugiperda* egg masses under different treatments in 2021.

| Treatment                              | No. of Egg masses collected |       | No. of parasitoids |       | No. of Egg masses parasitized |       | Overall parasitism (%) |       |
|----------------------------------------|-----------------------------|-------|--------------------|-------|-------------------------------|-------|------------------------|-------|
|                                        | 2021A                       | 2021B | 2021A              | 2021B | 2021A                         | 2021B | 2021A                  | 2021B |
| <b>Lira</b>                            |                             |       |                    |       |                               |       |                        |       |
| Amdocs®                                | 5                           | 2     | 0                  | 0     | 0                             | 0     | 0.0                    | 0.0   |
| Roket®                                 | 0                           | 9     | 0                  | 0     | 0                             | 0     | 0.0                    | 0.0   |
| <i>Beauveria bassiana</i>              | 3                           | 5     | 0                  | 0     | 0                             | 0     | 0.0                    | 0.0   |
| <i>Metarhizium anisopliae</i>          | 2                           | 6     | 10                 | 0     | 1                             | 0     | 50.0                   | 0.0   |
| <i>Metarhizium anisopliae</i> icipe 7  | 4                           | 4     | 0                  | 0     | 0                             | 0     | 0.0                    | 0.0   |
| <i>Metarhizium anisopliae</i> icipe 78 | 5                           | 4     | 0                  | 0     | 0                             | 0     | 0.0                    | 0.0   |
| General Biopesticide Cocktail          | 6                           | 0     | 30                 | 0     | 1                             | 0     | 16.7                   | 0.0   |
| Nimbecidine®                           | 4                           | 4     | 0                  | 0     | 0                             | 0     | 0.0                    | 0.0   |
| Control                                | 6                           | 8     | 0                  | 0     | 0                             | 0     | 0.0                    | 0.0   |
| <b>Wakiso</b>                          |                             |       |                    |       |                               |       |                        |       |
| Amdocs®                                | 2                           | 0     | 0                  | 0     | 0                             | 0     | 0.0                    | 0.0   |
| Roket®                                 | 1                           | 6     | 20                 | 0     | 1                             | 0     | 100.0                  | 0.0   |
| <i>Beauveria bassiana</i>              | 7                           | 3     | 0                  | 0     | 0                             | 0     | 0.0                    | 0.0   |
| <i>Metarhizium anisopliae</i>          | 2                           | 6     | 0                  | 0     | 0                             | 0     | 0.0                    | 0.0   |
| <i>Metarhizium anisopliae</i> icipe 7  | 1                           | 1     | 0                  | 0     | 0                             | 0     | 0.0                    | 0.0   |
| <i>Metarhizium anisopliae</i> icipe 78 | 1                           | 3     | 0                  | 0     | 0                             | 0     | 0.0                    | 0.0   |
| General Biopesticide Cocktail          | 4                           | 2     | 0                  | 0     | 0                             | 0     | 0.0                    | 0.0   |
| Nimbecidine®                           | 2                           | 4     | 0                  | 0     | 0                             | 0     | 0.0                    | 0.0   |
| Control                                | 2                           | 7     | 22                 | 0     | 2                             | 0     | 100.0                  | 0.0   |

The letters A and B after a year denote first and second rainy season, respectively.

**Supplementary Table S3.** Total number of larvae collected, total number of larval parasitoids recovered, and parasitism of *Spodoptera frugiperda* larvae under different treatments Lira and Wakiso during the long and short rainy season of 2020.

| Treatment and district        | No. of larvae collected |       | No. of parasitoids |       | Overall parasitism (%) |       | 2020A |      |     |     |      |      |     | 2020B |     |        |
|-------------------------------|-------------------------|-------|--------------------|-------|------------------------|-------|-------|------|-----|-----|------|------|-----|-------|-----|--------|
|                               | 2020A                   | 2020B | 2020A              | 2020B | 2020A                  | 2020B | Chd   | Chs  | Col | Cos | Coi  | Mic  | Tas | Chd   | Col | CosCoi |
| <b>Lira</b>                   |                         |       |                    |       |                        |       |       |      |     |     |      |      |     |       |     |        |
| Amdocs®                       | 4                       | 9     | 1                  | 0     | 25                     | 0     | 25    |      |     |     |      |      |     |       |     |        |
| <i>Beauveria bassiana</i>     | 14                      | 47    | 0                  | 0     | 0                      | 0     |       |      |     |     |      |      |     |       |     |        |
| Control                       | 50                      | 52    | 0                  | 2     | 0                      | 3.8   |       |      |     |     |      |      |     | 1.9   |     | 1.9    |
| <i>Metarhizium anisopliae</i> | 31                      | 48    | 0                  | 0     | 0                      | 0     |       |      |     |     |      |      |     |       |     |        |
| Nimbecidine®                  | 23                      | 28    | 0                  | 0     | 0                      | 0     |       |      |     |     |      |      |     |       |     |        |
| Roket®                        | 18                      | 19    | 0                  | 0     | 0                      | 0     |       |      |     |     |      |      |     |       |     |        |
| <b>Wakiso</b>                 |                         |       |                    |       |                        |       |       |      |     |     |      |      |     |       |     |        |
| Amdocs®                       | 7                       | 6     | 3                  | 0     | 42.9                   | 0     |       | 14.3 |     |     | 14.3 | 14.3 |     |       |     |        |
| <i>Beauveria bassiana</i>     | 51                      | 35    | 29                 | 4     | 27.4                   | 11.5  | 3.9   | 7.8  | 9.8 |     | 3.9  | 2.0  |     |       | 8.6 | 2.9    |
| Control                       | 94                      | 46    | 13                 | 4     | 17.1                   | 8.7   | 1.1   | 1.1  | 3.2 | 9.6 | 2.1  |      |     | 2.2   | 4.3 | 2.2    |
| <i>Metarhizium anisopliae</i> | 52                      | 40    | 12                 | 0     | 23.0                   | 0     | 3.8   | 11.5 | 5.8 |     | 1.9  |      |     |       |     |        |
| Nimbecidine®                  | 58                      | 28    | 13                 | 0     | 22.3                   | 0     |       | 3.4  | 8.6 | 3.4 | 6.9  |      |     |       |     |        |
| Roket®                        | 21                      | 12    | 5                  | 0     | 23.8                   | 0     | 9.5   |      | 4.8 |     | 9.5  |      |     |       |     |        |

Chd = *Charops cf. diversipes*; Chs; *Chelonus sp*; Col = *Coccygidium luteum*; Cos = *Coccygidium sp*; Coi = *Cotesia icipe*; Mic = *Micranisa sp*; Tas = Tachinidae. The letters A and B after a year denote first and second rainy season, respectively.

**Supplementary Table S4.** Total larvae collected, number of larval parasitoids recovered, and parasitism of *Spodoptera frugiperda* larvae under different treatments in Lira and Wakiso during the long and short rainy season in 2021.

| District and Treatment                   | No. of FAW larvae collected |     | No. of parasitoids |     | Parasitism (%) |     | 2021A |     |     |     |     | 2021B |     |     |     |     |
|------------------------------------------|-----------------------------|-----|--------------------|-----|----------------|-----|-------|-----|-----|-----|-----|-------|-----|-----|-----|-----|
|                                          | 21A                         | 21B | 21A                | 21B | 21A            | 21B | Chs   | Col | Cos | Coi | Tas | Chd   | Chs | Col | Coi | Tas |
| <b>Lira</b>                              |                             |     |                    |     |                |     |       |     |     |     |     |       |     |     |     |     |
| Amdocs®                                  | 22                          | 28  |                    | 1   | 0              | 3.6 |       |     |     |     |     | 3.6   |     |     |     |     |
| Rocket®                                  | 43                          | 67  |                    | 3   | 0              | 4.5 |       |     |     |     |     |       | 1.5 |     | 3   |     |
| <i>Beauveria bassiana</i>                | 43                          | 110 | 1                  | 3   | 2.3            | 2.7 |       |     |     | 2.3 |     |       |     |     |     | 2.7 |
| <i>Metarhizium anisopliae</i>            | 62                          | 107 | 1                  | 3   | 1.6            | 2.7 |       |     |     |     | 1.6 | 0.9   |     |     |     | 1.8 |
| <i>Metarhizium anisopliae</i> ICIPE 7    | 44                          | 88  |                    | 4   | 0              | 4.5 |       |     |     |     |     |       |     |     |     | 4.5 |
| <i>Metarhizium anisopliae</i> ICIPE 7851 |                             | 124 |                    | 3   | 0              | 2.4 |       |     |     |     |     |       |     |     |     | 2.4 |
| General Biopesticide Cocktail            | 49                          | 113 |                    | 4   | 0              | 3.6 |       |     |     |     | 0.9 |       |     |     |     | 2.7 |
| Nimbecidine®                             | 28                          | 81  |                    | 2   | 0              | 2.4 |       |     |     |     |     |       |     |     |     | 2.4 |
| Control                                  | 62                          | 98  | 1                  | 2   | 1.6            | 2   | 1.6   |     |     |     |     |       | 1   |     |     | 1   |
| <b>Wakiso</b>                            |                             |     |                    |     |                |     |       |     |     |     |     |       |     |     |     |     |
| Amdocs®                                  | 11                          | 25  | 0                  | 0   | 0              | 0   |       |     |     |     |     |       |     |     |     |     |
| Rocket®                                  | 13                          | 33  | 0                  | 1   | 0              | 3.0 |       |     |     |     |     |       |     |     |     | 3.0 |
| <i>Beauveria bassiana</i>                | 37                          | 44  | 1                  | 2   | 2.7            | 6.8 | 2.7   |     |     |     |     |       |     | 4.5 |     | 2.3 |
| <i>Metarhizium anisopliae</i>            | 38                          | 47  | 5                  | 3   | 13.1           | 4.5 |       | 2.6 | 7.9 |     | 2.6 |       |     |     | 4.5 |     |
| <i>Metarhizium anisopliae</i> ICIPE 7    | 29                          | 46  | 0                  | 1   | 0              | 2.2 |       |     |     |     |     | 2.2   |     |     |     |     |
| <i>Metarhizium anisopliae</i> ICIPE 7816 |                             | 59  | 1                  | 2   | 6.3            | 3.4 |       |     |     |     | 6.3 | 3.4   |     |     |     |     |
| General Biopesticide Cocktail            | 34                          | 55  | 3                  | 0   | 8.7            | 0   | 2.9   | 2.9 | 2.9 |     |     |       |     |     |     |     |
| Nimbecidine®                             | 37                          | 53  | 1                  | 1   | 16.2           | 1.9 |       | 8.1 | 8.1 |     |     |       |     |     |     | 1.9 |
| Control                                  | 40                          | 58  | 3                  | 4   | 7.5            | 6.8 |       | 7.5 |     |     |     | 3.4   | 1.7 | 1.7 |     |     |

Chs= *Chelonus* sp; Col = *Coccygidium luteum*; Cos = *Coccygidium* sp; Coi = *Cotesia icipe*; Tas = *Tachinidae*; Chd = *Charops cf. diversipes*. The letters A and B after a year denote first and second rainy season, respectively.
